# Supplementary material for: Controllable Preparation of Gold Nanocrystals with Different Porous Structures for SERS Sensing
Source: MDPI journal article supplement (doi:10.3390/molecules28052316), 2023-03-02
Supplement: s1 [file s1]

# Controllable Preparation of Gold Nanocrystals with Different Porous Structures for SERS Sensing

Yazhou Qin \*, Dewang Fang, Yulun Wu, Yuanzhao Wu and Weixuan Yao \*

Key Laboratory of Drug Prevention and Control Technology of Zhejiang Province, Zhejiang Police College, Hangzhou 310053, China

\* Correspondence: yazhouqin@zju.edu.cn (Y.Q.); yaoweixuan@zjpc.edu.cn (W.Y.)

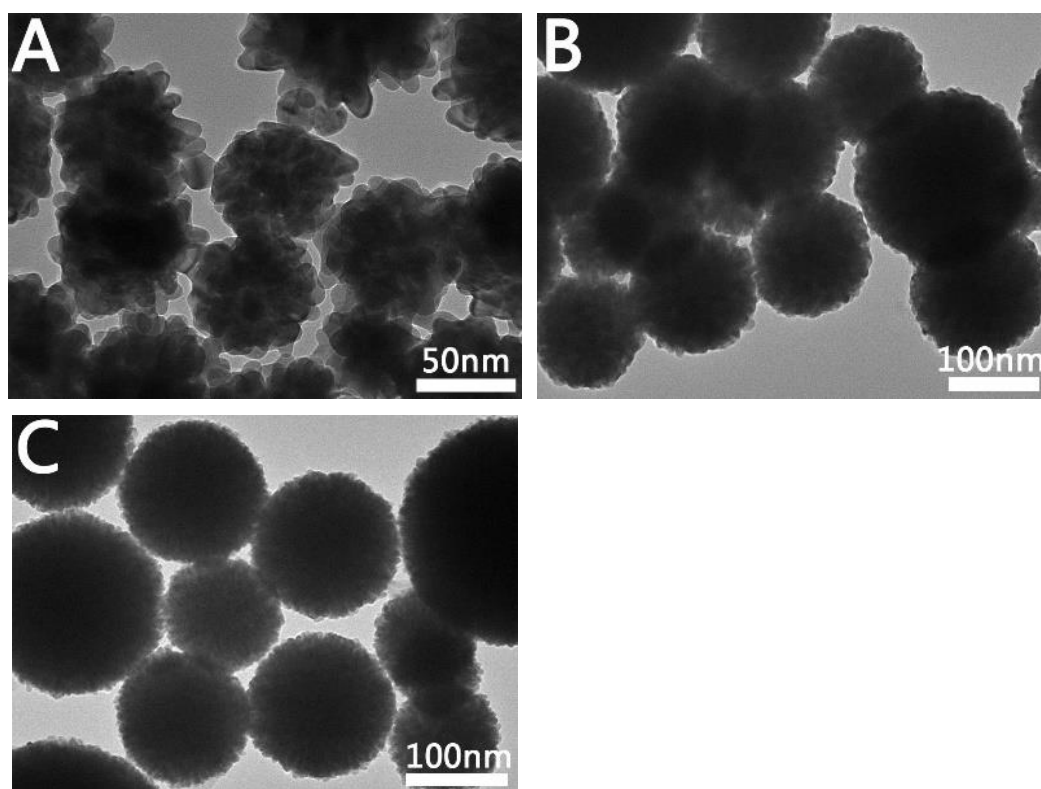

**Figure S1.** Without CTAB, the Au NCs were prepared by changing the amount of glutathione added. (A) 10  $\mu$ L, (B) 50  $\mu$ L and (C) 100  $\mu$ L.

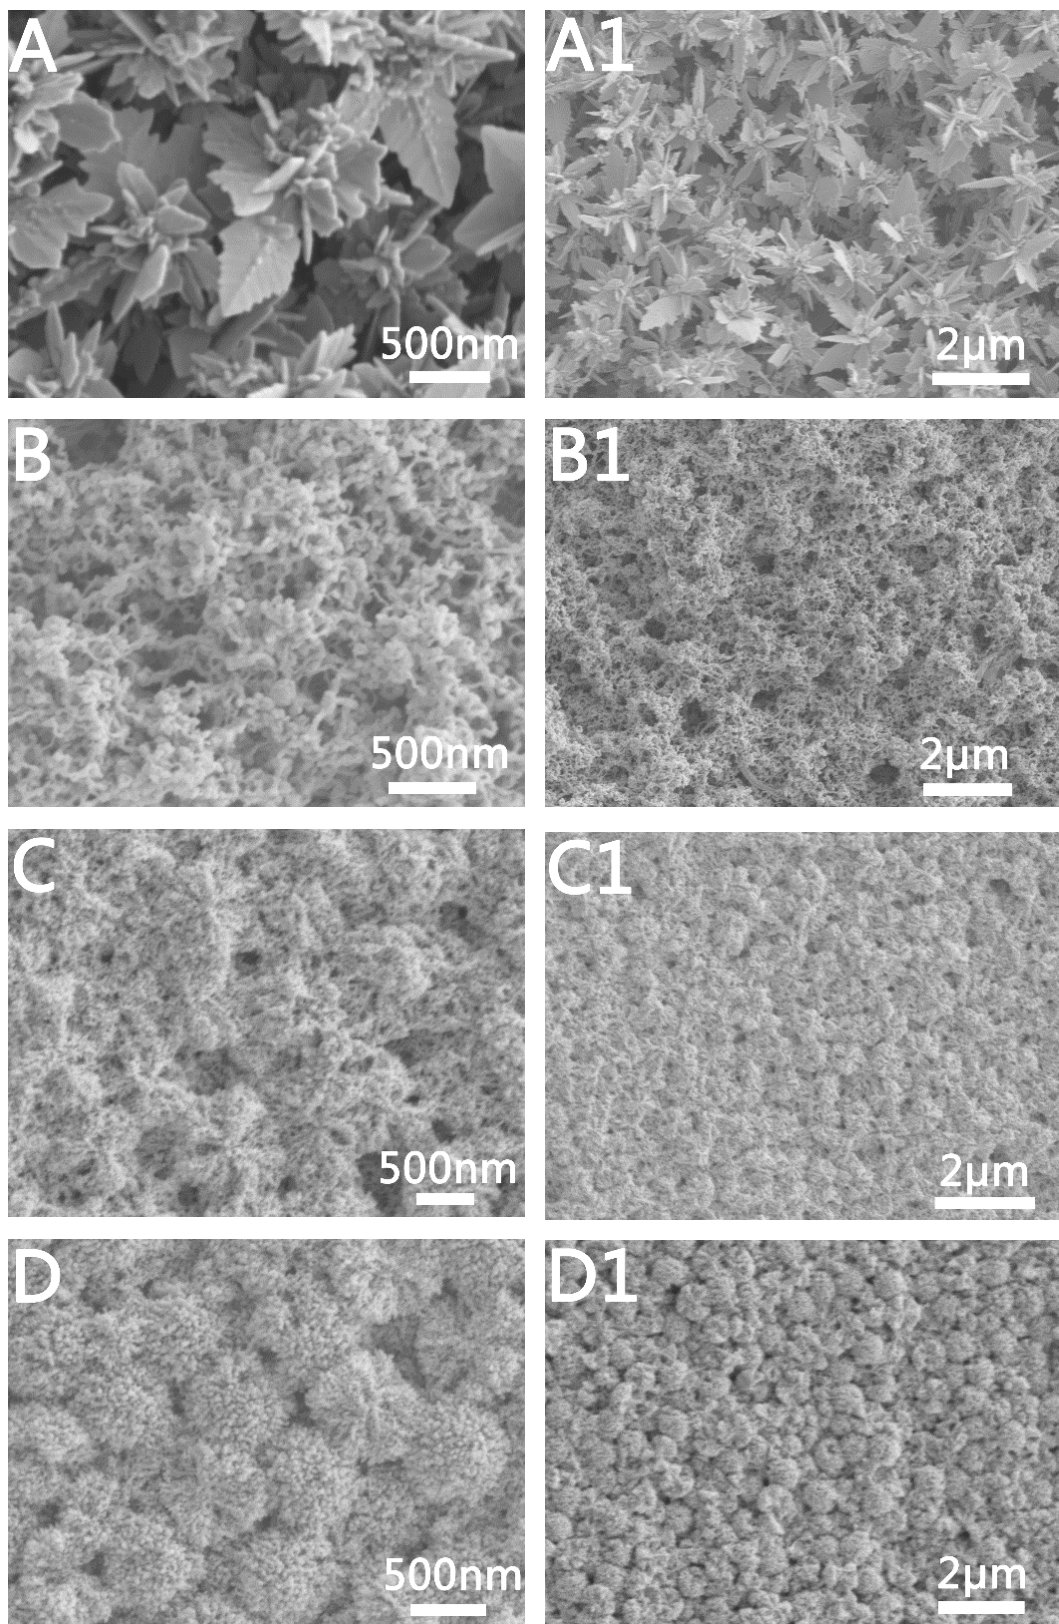

**Figure S2.** SEM images of gold nanoparticles prepared under different alkyl length conditions. (A) C<sub>6</sub>TAB, (B) C<sub>10</sub>TAB, (C) C<sub>12</sub>TAB, (D) C<sub>14</sub>TAB.

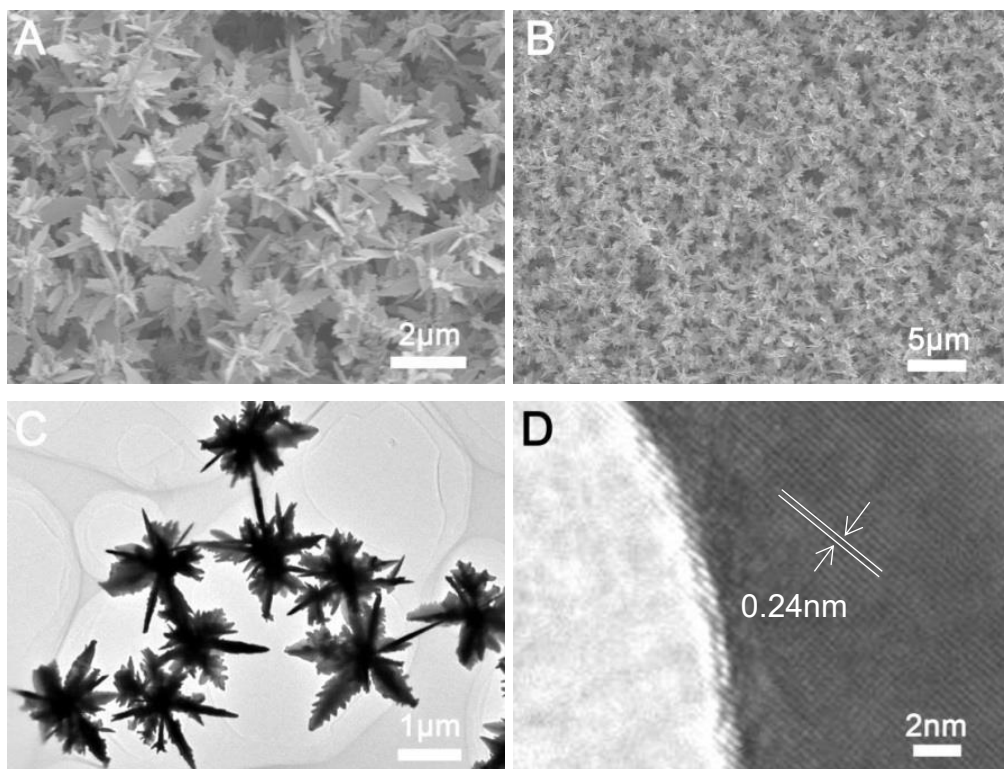

**Figure S3.** Structural characterization of leaf-shaped gold nanoparticles. (A) High-magnification SEM image. (B) and (C) low-magnification SEM image and TEM image. (D) High-resolution TEM image.

**Table S1.** Characteristic vibrations of R6G.

| SERS/ $\text{cm}^{-1}$ |                                                            |
|------------------------|------------------------------------------------------------|
| 613                    | $\delta(\text{C-C-C})$                                     |
| 772                    | $\gamma(\text{C-H})$                                       |
| 1181                   | $\delta(\text{N-H}), \delta(\text{C-H})$                   |
| 1312                   | $\nu(\text{C}=\text{C})$                                   |
| 1362                   | $\nu(\text{C}=\text{O}), \nu(\text{C}=\text{C})$           |
| 1508                   | $\nu(\text{C}=\text{C})$ benzene, $\nu(\text{C}=\text{O})$ |

Def:  $\nu$ : stretching;  $\delta$ : in-plane bending;  $\sigma$ : scissoring;  $\rho$ : rocking.  $\gamma$ : out-of-plane bending;  $\tau$ : twisting;  $\omega$ : wagging.  $\beta$ : ring breathing.

**Table S2.** Peak intensity of  $10^{-5}$  M R6G at  $613 \text{ cm}^{-1}$  and  $1362 \text{ cm}^{-1}$  with different morphology Au NCs as SERS substrate.

|                            | $613 \text{ cm}^{-1}$ | $1362 \text{ cm}^{-1}$ |
|----------------------------|-----------------------|------------------------|
| Microporous Au NCs         | 534                   | 413                    |
| Leaf-shaped Au NCs         | 962                   | 887                    |
| Strip structure Au NCs     | 1908                  | 1924                   |
| Mesoporous Au NCs          | 4625                  | 3507                   |
| Hierarchical porous Au NCs | 19371                 | 16004                  |
